# Supplementary material for: Epidemiology and genetic characteristics of Clostridioides difficile isolates in Northwest China
Source: PeerJ journal article supplement (doi:10.7717/peerj.19877), 2025-08-15
Supplement: Raw_Data_of_Table_2.xlsx [file Raw_Data_of_Table_2.xlsx]

## Sheet: Sheet1
Number	C. difficile strain isolated	Genders	Age	Source	Co-morbid conditions	Antibiotic Use Prior to Diarrhea(Y/N)	Duration of Hospitalization Prior to Diarrhea
1	LZU1	Male	61	Interventional ward	Ruptured iliac artery aneurysm	N	4
2	LZU2	Male	1	Pediatrics ward	Meckel's diverticulum	Y	3
3	LZU3	Male	45	Infectious Diseases ward	Gastrointestinal haemorrhage	Y	5
4	LZU4	Male	12	Pediatrics ward	Gastrointestinal dysfunction	Y	3
5	LZU5	Male	53	General Surgery ward V	Gastric polyps	Y	4
6	LZU6	Female	46	Nephrology ward	Chronic Renal Failure Uremia	Y	5
7	LZU7	Female	51	Infectious Diseases ward	Gastrointestinal haemorrhage	Y	6
8	LZU8	Male	44	Hematology ward	Leukaemia	Y	5
9	LZU9	Male	83	Gastroenterology ward	Gastric malignancy	Y	2
10	LZU10	Male	66	General Surgery ward I	Acute gangrenous appendicitis	Y	4
11	LZU11	Female	82	Pulmonary ward	Lung Cancer	Y	5
12	LZU12	Female	54	Interventional ward	Chronic Atrophic Gastritis	Y	6
13	LZU13	Male	52	Gastroenterology ward	Gastrointestinal haemorrhage	N	3
14	LZU14	Male	48	General Surgery ward V	Acute inferior wall myocardial infarction	Y	4
15	LZU15	Male	59	General Surgery ward V	Appendicitis	Y	5
16	LZU16	Female	62	Intensive Care Unit	Hypertension	N	15
17	LZU17	Female	61	Neurosurgery ward	Intracerebral haemorrhage	Y	16
18	LZU18	Male	48	Emergency Intensive Care Unit	Pyelonephritis	Y	8
19	LZU19	Male	57	Rehabilitation ward	Hypertension	Y	8
20	LZU20	Male	63	Hematology ward	Leukaemia	Y	7
21	LZU21	Female	1	Pediatrics ward	Severe Pneumonia	Y	2
22	LZU22	Female	57	Gastroenterology ward	Ulcerative colitis	Y	5
23	LZU23	Male	80	Vascular Surgery ward	Aortic coarctation	Y	6
24	LZU24	Female	74	Cardiology ward	Acute inferior wall myocardial infarction	Y	8
25	LZU25	Male	38	Hematology ward	Leukaemia	Y	6
