# Supplementary material for: Epidemiology and genetic characteristics of Clostridioides difficile isolates in Northwest China
Source: PeerJ journal article supplement (doi:10.7717/peerj.19877), 2025-08-15
Supplement: Raw_Data_of_Table_3_and_4.xlsx [file Raw_Data_of_Table_3_and_4.xlsx]

## Sheet: card
Resistance Gene														Antibiotics used
Sample	AAC(6')-Ie-APH(2'')-Ia	APH(2'')-If	gyrA	dfrF	vanXYG	vanTG	tetM	tetB(P)	tet(W/N/W)	catP	cdeA	23S rRNA	ErmB	Cephalosporins	Penicillins	Nitroimidazoles	Vancomycin	Carbapenems	Quinolones
LZU1	0	1	0	0	0	0	1	0	0	0	1	1	0	0	0	0	0	0	0	0
LZU2	1	0	0	1	0	0	1	0	0	0	1	1	1	1	0	0	0	0	0	1
LZU3	1	0	1	0	1	0	0	1	0	0	1	1	1	0	1	0	0	0	0	1
LZU4	1	0	0	0	1	0	0	0	1	1	1	1	1	1	0	0	0	0	0	1
LZU5	0	0	0	0	1	0	0	0	0	0	1	1	0	1	0	0	0	0	0	1
LZU6	1	0	0	0	1	0	1	0	0	0	1	1	1	0	1	0	0	0	0	1
LZU7	1	0	0	0	1	0	1	0	0	0	1	1	1	1	0	0	0	0	0	1
LZU8	1	0	0	0	1	0	1	0	0	0	1	1	1	0	1	0	1	0	0	2
LZU9	1	0	0	0	1	0	0	0	0	0	1	1	1	1	1	0	0	0	0	2
LZU10	1	0	0	0	0	0	1	0	0	0	1	1	1	1	0	1	0	0	0	2
LZU11	1	0	0	0	1	0	1	0	0	0	1	1	1	1	0	0	0	0	0	1
LZU12	0	0	0	0	0	0	0	0	0	0	1	1	0	1	0	0	0	0	0	1
LZU13	0	0	0	0	1	0	0	0	0	0	1	1	0	0		0	0	0	0	0
LZU14	1	0	1	0	1	0	1	0	0	0	1	1	1	1	0	0	0	0	0	1
LZU15	0	0	0	0	1	0	0	0	0	0	1	1	0	1	0	1	0	0	0	2
LZU16	0	0	0	0	1	0	0	0	0	0	1	1	0			0	0	0	0	0
LZU17	0	0	0	0	1	0	0	0	0	0	1	1	0	1	1	0	0	0	0	2
LZU18	1	0	1	0	1	0	0	1	0	0	1	1	1	0	0	0	1	0	0	1
LZU19	0	1	0	0	1	0	0	1	0	0	1	1	1	1	0	0	0	0	1	2
LZU20	1	0	0	1	0	0	1	0	0	0	1	1	1	1	0	0	1	0	0	2
LZU21	0	0	0	0	1	0	0	0	0	0	1	1	0	1	0	0	0	0	0	1
LZU22	1	0	0	0	1	0	0	0	0	0	1	1	1	0	0	1	0	0	0	1
LZU23	0	0	0	0	1	1	0	0	0	0	1	0	0	0	1	0	0	0	0	1
LZU24	1	0	1	0	1	0	0	1	0	0	1	1	1	1	0	0	0	0	0	1
LZU25	0	0	0	0	1	0	0	0	0	0	1	0	0	0	0	0	0	1	0	1
total	14	2	4	2	20	1	9	4	1	1	25	23	15	15	6	3	3	1	1	29
